# Supplementary material for: RNA interference-mediated silencing of genes involved in the immune responses of the soybean pod borer Leguminivora glycinivorella (Lepidoptera: Olethreutidae)
Source: PeerJ. 2018 Jun 12;6:e4931. doi: 10.7717/peerj.4931 (PMC6003399; doi:10.7717/peerj.4931)
Supplement: Table S1 [file peerj-06-4931-s001.xlsx]

## Sheet: Sheet1
Table S1 Details regarding the genes encoding Leguminivora glycinivorella peptidoglycan recognition proteins (PGRPs)
Group	Namea (Gene ID)	Domain	No. of domain	Length (residues)	Gene size (bp)	Signal peptide	pI	MW (kDa)	ortholog in insects (Gene ID)
Microbial recognition molecules	LgPGRP-SC1 (MH200914)	Ami_2	1	20+173	659	MIRVLSVFVIMILPKDFVLA	8.87	21.58	DmPGRP-SC1a (NM_136563.2)
	LgPGRP-SC2 (MH200915)	Ami_2	1	16+173	900	MSLIAVLLVLIKLCAA	6.29	20.67	DmPGRP-SC2 (NM_136566.2)
	LgPGRP-SD1 (MH200916)	PGRP	1	192	588	no	5.08	22.17	DmPGRP-SD (NM_139888.3)
	LgPGRP-SD2 (MH200917)	Ami_2	1	26+183	651	MLDHNKLVFIYVITTVVICISQYAET	6.29	23.81	DmPGRP-SD (NM_139888.3)
	LgPGRP-LB (MH200918)	Transmembrane/Ami_2	2	258	1086	no	5.86	29.02	DmPGRP-LB (NM_001260123.1)
	LgPGRP-LB1 (MH200919)	Ami_2	1	20+188	798	MAISGASYCLLLTVFCYVNA	5.87	22.56	DmPGRP-LB (NM_001260123.1)
	LgPGRP-LB2a (MH200920)	PGRP	1	124	1201	no	5.4	13.64	DmPGRP-LB (NM_001260123.1)
	LgPGRP-LB2b (MH200921)	Ami_2	1	17+186	675	MAGKIIIFACLASSVLS	8.65	22.21	DmPGRP-LB (NM_001260123.1)
	LgGNBP3 (MH200922)	CBM39/ Glyco_hydro_16	2	22+466	2194	MCSNKNTMYLLYLCVCASVVVC	6.07	54.91	DmGNBP3 (NM_079262.3)
Immune signalling molecules	LgTLR-3 (MH243029)	LRR/TIR	2	17+742	2355	MNIYAFVICNCLAMVWG	6.53	87.62	BmTLR-3 (XM_012694421.2)
	LgTLR-4 (MH243030)	LRR/TIR	2	19+836	2883	MFGARYLWLLLCYAQCARA	6.24	98.17	Bm-TLR-4 (XM_012691451.2)
	LgToll-5-1a (MH243021)	LRR/LRR-CT/TIR	3	21+945	3817	MNIRDAVRVVALLALATCVTT	5.69	107.6	BmToll-5 (XM_021348482.1)
	LgToll-5-1b (MH243022)	LRR/LRR-CT/TIR	3	22+989	3989	MMDLKKSLVCVAVLLTLATSQS	5.62	111.22	BmToll-5 (XM_021348482.1)
	LgToll-6 (MH243025)	LRR/LRR-CT/TIR	3	27+1252	4434	MALQKSSSRKQAFSHILFLFVVGLNVA	5.97	146	DmToll-6 (NM_001259837.3)
	LgTLR-6-1 (MH243023)	LRR/LRR-CT/TIR	3	21+1317	4941	MLSMGLLAVAVWSWSWVGAGG	5.5	151.59	BmTLR-6-1 (XM_004921681.3)
	LgTLR-6-2 (MH243024)	LRR/LRR-CT/TIR	3	25+1317	4881	MLRNLCGMSSLKVWMCLVVVAAARA	5.82	151.97	BmTLR-6-2 (XM_004921682.3)
	LgToll-7 (MH243026)	LRR/TIR	2	1293	4446	no	6.16	146.79	BmToll7-2 (NM_001123349.1)
	LgTLR-7 (MH243027)	LRR/LRR-CT/TIR	3	1249	4613	no	6.21	141.71	BmTLR-7-1 (XM_004921675.2)
	LgToll-8 (MH243028)	LRR/LRR-CT/TIR	3	25+1254	4568	MCCTWFTSALLVLSAVLTTWSASLS	6.09	145.18	DmToll-8 (NM_080018.2)
	LgChaoptin (MH200923)	LRR/LRR-CT	2	1197		no			DmChaoptin (NM_001276207.1)
	LgCSIT (MH200924)	ECSI/ECIST_C	2	371	1327	no	5.61	42.41	DmECSIT (NM_141345.2)
	LgTollip1 (MH200925)	C2/CUE	2	279	1274	no	5.04	30.47	BmTollip (XM_012696244.2)
	LgFadd (MH200926)		0	217	1920	no	9.79	25.74	PmFadd (NM_001202536.1)
	LgDredd (MH200927)	CASc	1	544	1824	no	5.43	62.64	DmDredd (NM_057903.4)
	LgIap2 (MH200928)	BIR	1	597	2376	no	5.57	65.64	BmIap2 (NM_001163903.1)
Immune response effector molecules	Lgsnake1 (MH200929)	CLIP/Tryp_SPc	2	427	1432	no	6.26	47.25	Dmsnake (NM_001104296.2)
	Lgsnake2 (MH200930)	CLIP/Tryp_SPc	2	403	1987	no	7.78	44.87	Dmsnake (NM_001104296.2)
	Lgserpin1 (MH200931)	SERPIN	1	20+450	1683	MRFVLFVGLLLMAISQLANC	4.56	52.91	DmSerpin28B (NM_135284.3)
	Lgserpin2 (MH200932)	SERPIN	1	20+438	2250	MRFVLFVGLLLMAISQLANC	5.71	50.53	DmSerpin27A (NM_001273214.1)
	Lgserpin3 (MH200933)	SERPIN	1	19+490	1656	MRFLFLIGLITWHVTDSNA	5.22	45.27	DmSerpin42Da (NM_206034.2)
	Lgdefensin1 (MH200934)	Knot1	1	18+97	326	MKVLVVVFLLTVFVTVMS	8.24	11.57	Dmdefensin (NM_078948.3)
	Lgdefensin2 (MH243020)	Knot1	1	49	419	no	8.65	5.39	Dmdefensin (NM_078948.3)
	Lg i-type1 (MH200935)	Destabilase	1	158	700	no	7.93	17.58	Dpi-type (OWR49030.1)
	Lg i-type2 (MH200936)	Destabilase	1	20+140	1670	MASAVMKFSAILFLVAACAA	5.14	17.14	Dpi-type (OWR49030.1)
	Lg c-type1 (MH200937)	LYZ1	1	20+121	805	MSRPCLLLLLAACLVHSSYG	9.15	16.27	Ppc-type (BAM20731.1)
	Lg c-type2 (MH200938)	LYZ1	1	16+122	584	MYKFVVFALVVVACLA	8.36	15.69	Ppc-type (BAM20731.1)
	Lg c-type3 (MH200939)	LYZ1	1	290	2044	no	8.46	32.46	Ppc-type (BAM20731.1)
	Lg c-type4 (MH200940)	LYZ1	1	18+120	635	MAKLMLVVLGALVAMAAA	8.12	15.23	Ppc-type (BAM20731.1)
	Lg c-type5 (MH200941)	LYZ1	1	27+140	703	MCKIKEMTILSLIFLALVAHDSLLAEA	8.01	18.83	Ppc-type (BAM20731.1)
	Lg c-type6 (MH200942)	LYZ1	1	18+161	595	MAARCVLALCFVFLVVDA	9.38	20.7	Ppc-type (BAM20731.1)
	Lg c-type7 (MH200943)	LYZ1	1	21+163	581	MRISLVLPICLIVLFCGSARA	9.43	21.29	Ppc-type (BAM20731.1)
Dm, Drosophila melanogaster; Bm, Bombyx mori; Lg, Leguminivora glycinivorella; Dp, Danaus plexippus; Pp, Papilio polytes.
